# Supplementary material for: The Effect of a Higher Bias Gas Flow on Imposed T-Piece Resistance and Breathing in Preterm Infants at Birth
Source: Frontiers journal article supplement (doi:10.3389/fped.2022.817010), 2022-03-17
Supplement: Data_Sheet_1.PDF [file Data_Sheet_1.PDF]

## Supplement 1 Calculations

The resistance of the PEEP-valve can be calculated by using Ohm's law, where resistance is equal to a pressure difference divided by the flow, as explained in the main article. In addition, all calculations are based on the set-up shown in Figure 1.

In case the mask is occluded ( $Q_m=0$ ), the resistance is equal to CPAP divided by the bias flow ( $Q_b$ ).

$$(1) R_v = \frac{\Delta P}{Q_v} = \frac{(P_d - P_{at})}{Q_b + Q_m} = \frac{(CPAP - 0)}{Q_b + 0} = \frac{CPAP}{Q_b}$$

In case the infant is breathing, the resistance is equal to the pressure in the device (which will fluctuate because of the breathing), divided by both flows.

$$(2) R_v = \frac{\Delta P}{Q_v} = \frac{(P_d - P_{at})}{(Q_b + Q_m)} = \frac{P_d}{(Q_b + Q_m)}$$

Rewriting the latter formula results in a formula to determine the pressure in the device:

$$(3) P_d = R_v(Q_b + Q_m) = R_v Q_b + R_v Q_m$$

The inspiratory and expiratory flow through the mask ( $Q_m$ ) can be derived from Ohm's law as well. In this case  $Q_m$  is equivalent to the pressure difference between the device ( $P_d$ ) and the alveoli ( $P_{al}$ ), divided by the resistance of the airways ( $R_{aw}$ ).

$$(4) Q_m = \frac{\Delta P}{R_{aw}} = \frac{(P_{al} - P_d)}{R_{aw}}$$

Combining this with formula 3 results in:

$$(5) Q_m = \frac{\Delta P}{R_{aw}} = \frac{(P_{al} - P_d)}{R_{aw}} = \frac{P_{al} - (R_v Q_b + R_v Q_m)}{R_{aw}} = \frac{P_{al} - R_v Q_b - R_v Q_m}{R_{aw}}$$

$$(6) Q_m * R_{aw} = P_{al} - R_v * Q_b - R_v * Q_m$$

$$(7) Q_m * R_{aw} + R_v * Q_m = P_{al} - R_v * Q_b$$

$$(8) Q_m(R_{aw} + R_v) = P_{al} - R_v * Q_b$$

$$(9) Q_m = \frac{P_{al} - R_v * Q_b}{R_{aw} + R_v}$$

From formula 1 we know that:

$$(10) R_v = \frac{CPAP}{Q_b}, \quad \text{so } R_v * Q_b = CPAP$$

Adding that in formula 9 results in a formula showing the factors that influence  $Q_m$ .

$$(11) Q_m = \frac{P_{al} - CPAP}{R_{aw} + R_v}$$
